# Supplementary material for: Green synthesis of fluorescent carbon quantum dots from bagasse: inhibition of calcium sulphate scales
Source: Royal Society of Chemistry journal article supplement (doi:10.1039/d3nj05155b), 2023-12-22
Supplement: d3nj05155b1.pdf [file d3nj05155b1.pdf]

**Supplementary Material**

**Green synthesis of fluorescent carbon quantum dots from  
bagasse: inhibition of calcium sulphate scales**

*Fangming Yang, Duanzhi Li, Zhihao Chen\*, Wenzhong Yang\**

School of Chemical and Molecular Engineering, Nanjing Tech University,  
Nanjing, 211816, China

---

\*Corresponding author: Zhihao Chen, Wenzhong Yang.

E-mail address: [chenzhihao2012@njtech.edu.cn](mailto:chenzhihao2012@njtech.edu.cn) (Zhihao Chen)

[yangwznjtech@163.com](mailto:yangwznjtech@163.com) (Wenzhong Yang).

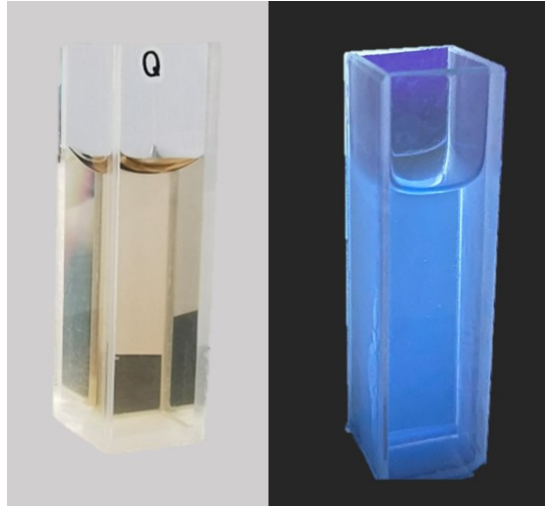

**Fig. S1.** The photos of CQDs solution: (a) under normal light; (b) under UV light.

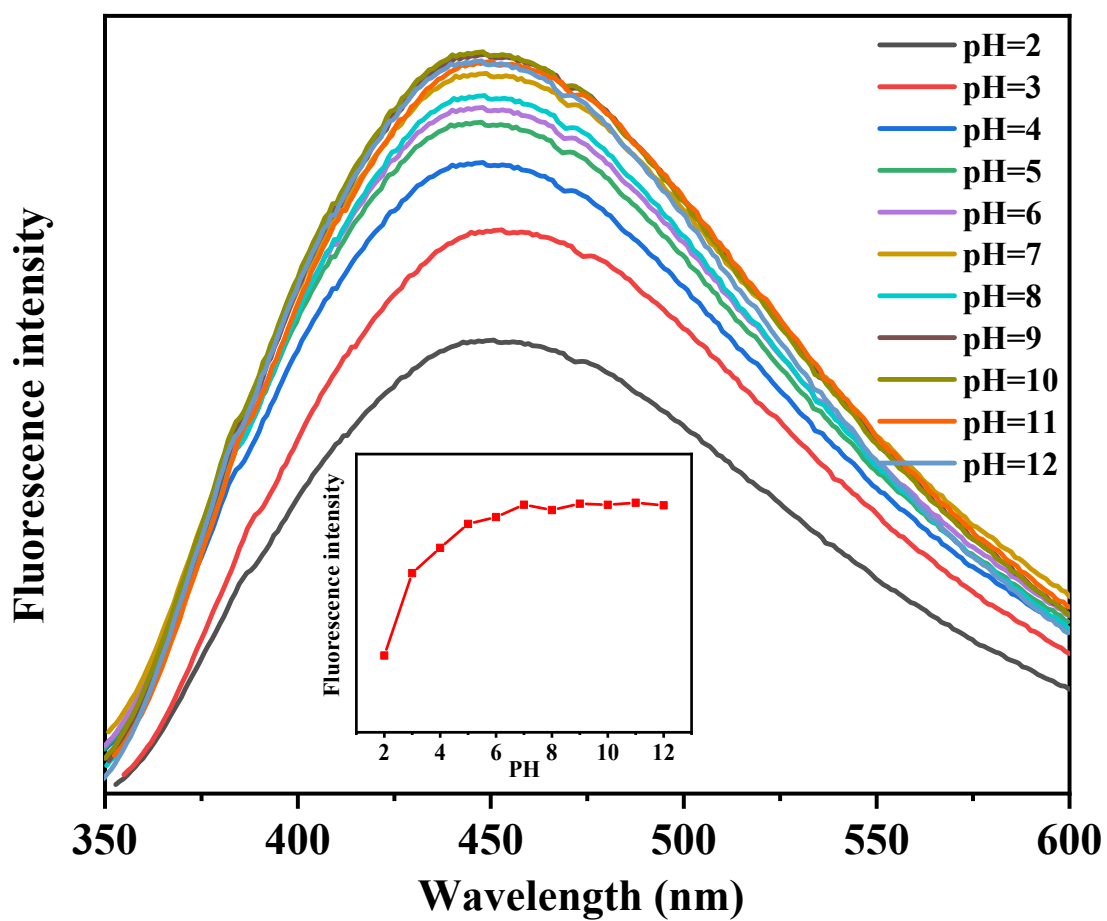

Fig. S2. Optical properties of CQDs: Effect of pH on fluorescence intensity.

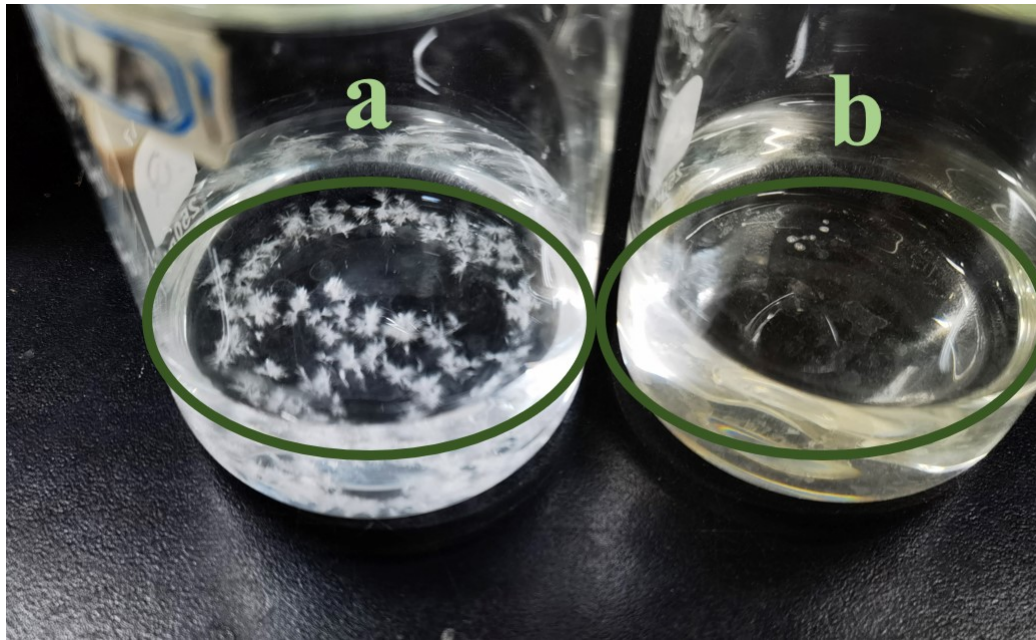

**Fig. S3.** The photos of CaSO<sub>4</sub> solution: (a) free CQDs; (b) with CQDs.  
(T = 70 °C; heating time = 25 h).

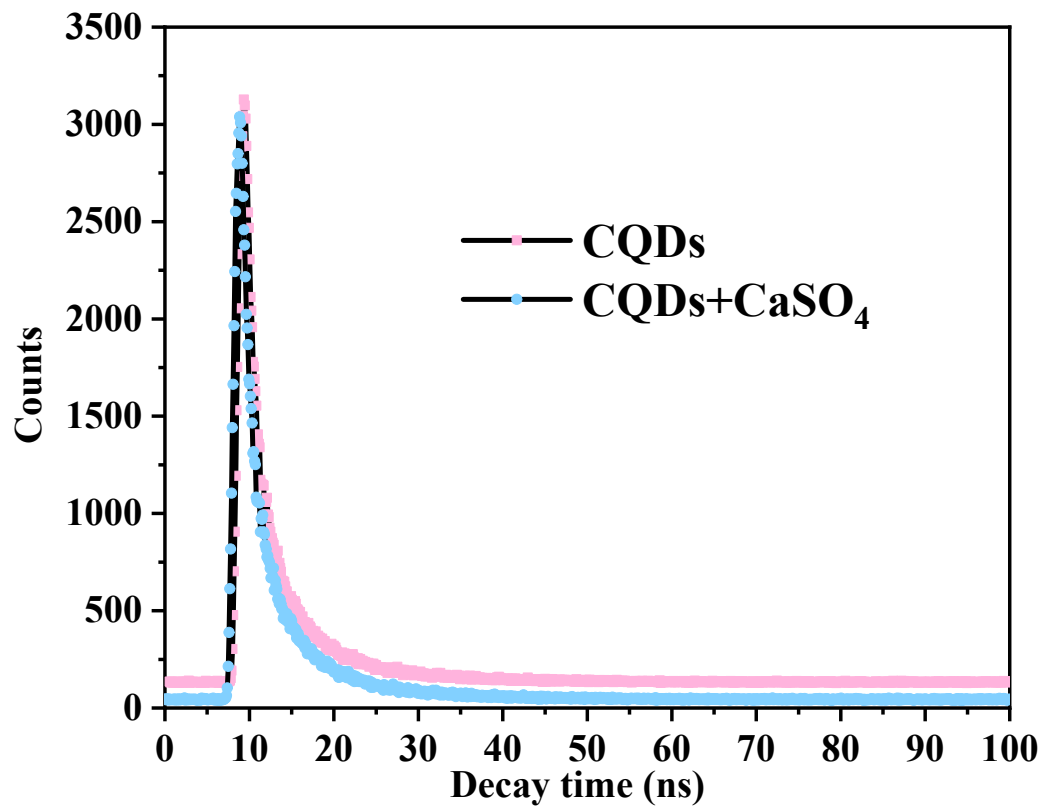

**Fig. S4.** Time-resolved decay curves of CQDs.
